# Supplementary material for: Isolation and Characterization of Swinepox Virus from Outbreak in Russia
Source: MDPI journal article supplement (doi:10.3390/ani13111786), 2023-05-27
Supplement: s1 [file animals-2382264-supplementary.pdf › animals-2382264-supplementary.pdf]

## Supplementary Materials

**Table S1.** Clinical Scoring of pigs inoculated with swinepox virus.

| CHARACTERISTIC      | SCORE (POINTS) |                                  |
|---------------------|----------------|----------------------------------|
| 1. ANOREXIA         | 0              | Without changes                  |
|                     | 1              | Reduced eating                   |
|                     | 2              | Partial refusal of feed          |
|                     | 3              | Not eating                       |
| 2. BEHAVIOR         | 0              | Without changes                  |
|                     | 1              | Depressed                        |
|                     | 2              | Gets up only slowly when touched |
|                     | 3              | Remains recumbent when touched   |
| 3. SKIN LESIONS     | 0              | Normal                           |
|                     | 1              | Exanthema                        |
|                     | 2              | Papules                          |
|                     | 3              | Suppuration                      |
|                     | 4              | Scarring                         |
| 4. RHINITIS         | 0              | Normal                           |
|                     | 1              | Attended                         |
| 5. CONJUNCTIVITIS   | 0              | Normal                           |
|                     | 1              | Attended                         |
| 6. BODY TEMPERATURE | 0              | 38.0-39.9                        |
|                     | 1              | 40.0-41.0                        |
|                     | 2              | 41.1-42.0                        |
| 7. ITCHING          | 0              | Normal                           |
|                     | 1              | Attended                         |
| 8. DIARRHEA         | 0              | Normal                           |
|                     | 1              | Watery diarrhea                  |
|                     | 2              | Severe bloody diarrhea           |
